# Supplementary material for: Topological ferrimagnetism and superparamagnetic-like behaviour in a disordered homometallic coordination network
Source: Royal Society of Chemistry journal article supplement (doi:10.1039/b706829h), 2007-01-01
Supplement: b706829h.pdf [file b706829h.pdf]

### Supplementary information

Topological Ferrimagnetism and Superparamagnetic-like Behaviour in a Disordered Homometallic Coordination Network - *R. Patel, M.T. Weller and D.J. Price\**

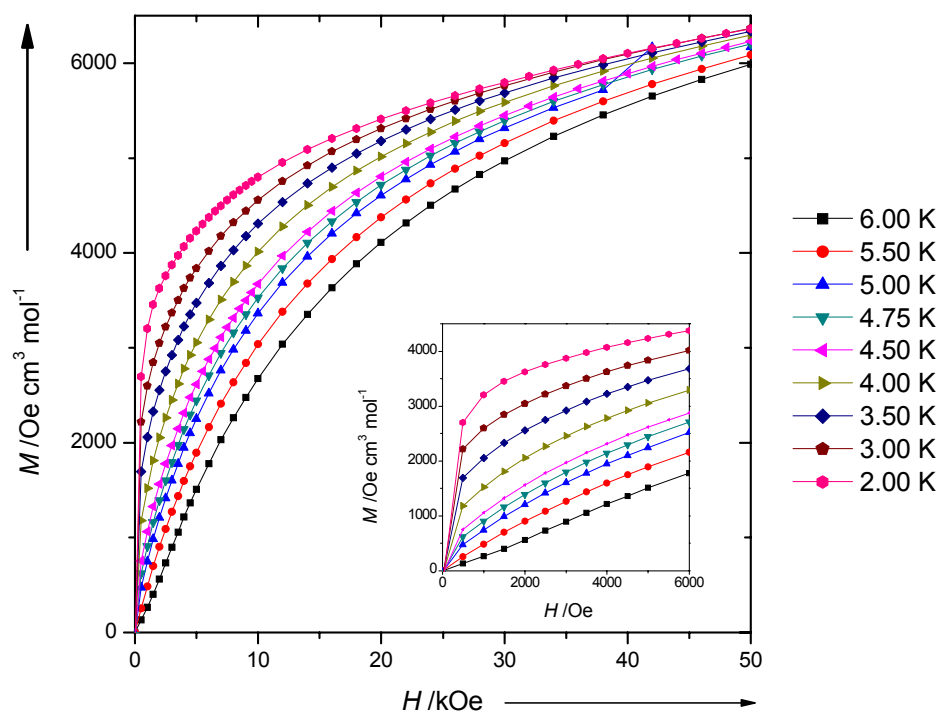

**Figure S1.** Magnetization curves of **1** obtained by field sweeps (0 - 50 kOe) for a range of different temperatures. Between each measurement the sample was heated to 20 K (above  $T_C$ ) and cooled in zero magnetic field. The insert shows the same data in the low field region to emphasis the initial change in magnetization.
